# Supplementary material for: Migration of gastric cancer is suppressed by recombinant Newcastle disease virus (rL-RVG) via regulating α7-nicotinic acetylcholine receptors/ERK- EMT
Source: Springer Nature journal article supplement (doi:10.1186/s12885-019-6225-9), 2019-10-22
Supplement: MOESM1 [file 17299180]

## Result of STR matching analysis by your data.

- DSMZ Profile Database -

A graphical presentation is shown at the bottom of this page.

| EV              | Cell No.   | Cell name                                                         | Locus names              |           |        |         |       |      |     |       |         |         |
|-----------------|------------|-------------------------------------------------------------------|--------------------------|-----------|--------|---------|-------|------|-----|-------|---------|---------|
|                 |            |                                                                   | D5S818                   | D13S317   | D7S820 | D16S539 | VWA   | TH01 | AM  | TPOX  | CSF1PO  | Figures |
|                 |            |                                                                   | <i>Query (Your Cell)</i> |           |        |         |       |      |     |       |         |         |
|                 |            |                                                                   | 11,12                    | 13.3,13.3 | 12,12  | 9,10    | 16,18 | 7,7  | X,X | 12,12 | 10,10   |         |
| 0.89<br>(32/36) | CCL-21     | AV3                                                               | 11,12                    | 13.3,13.3 | 12,12  | 9,10    | 16,18 | 7,7  | X,X | 8,12  | 9,10    | -       |
| 0.83<br>(30/36) | 227        | BT-B                                                              | 11,12                    | 13.3,13.3 | 8,12   | 9,10    | 16,18 | 7,7  | X,X | 8,12  | 9,10    | -       |
| 0.83<br>(30/36) | 228        | SBC-2                                                             | 11,12                    | 12,13.3   | 12,12  | 9,10    | 16,18 | 7,7  | X,X | 8,12  | 9,10    | -       |
| 0.83<br>(30/36) | 229        | SBC-7                                                             | 11,12                    | 12,13.3   | 12,12  | 9,10    | 16,18 | 7,7  | X,X | 8,12  | 9,10    | -       |
| 0.83<br>(30/36) | CCL-2.2    | HeLa S3                                                           | 11,12                    | 13.3,13.3 | 8,12   | 9,10    | 16,18 | 7,7  | X,X | 8,12  | 9,10    | -       |
| 0.83<br>(30/36) | CCL-25     | WISH                                                              | 11,12                    | 13.3,13.3 | 8,12   | 9,10    | 16,18 | 7,7  | X,X | 8,12  | 9,10    | -       |
| 0.83<br>(30/36) | CRL-13003  | GH354                                                             | 11,12                    | 13.3,13.3 | 8,12   | 9,10    | 16,18 | 7,7  | X,X | 8,12  | 9,10    | -       |
| 0.83<br>(30/36) | IFO50004   | WISH                                                              | 11,12                    | 13.3,13.3 | 8,12   | 9,10    | 16,18 | 7,7  | X,X | 8,12  | 9,10    | -       |
| 0.83<br>(30/36) | JCRB0213   | HeLa AG                                                           | 11,12                    | 13.3,13.3 | 8,8    | 9,10    | 16,18 | 7,7  | X,X | 12,12 | 9,10    | -       |
| 0.83<br>(30/36) | JCRB0214   | HeLa TG                                                           | 11,12                    | 13.3,13.3 | 8,8    | 9,10    | 16,18 | 7,7  | X,X | 12,12 | 9,10    | -       |
| 0.83<br>(30/36) | JCRB0215   | HeLa TG CAP                                                       | 11,12                    | 13.3,13.3 | 8,8    | 9,10    | 16,18 | 7,7  | X,X | 12,12 | 9,10    | -       |
| 0.83<br>(30/36) | JCRB0649.1 | HeLa.P3                                                           | 11,12                    | 12,13.3   | 8,12   | 9,10    | 16,18 | 7,7  | X,X | 12,12 | 9,10    | -       |
| 0.80<br>(28/35) | RCB2105    | D98-AH2                                                           | 11,12                    |           | 12,12  | 9,10    | 16,18 | 7,7  | X,X | 8,12  | 9,10,11 | -       |
| 0.78<br>(28/36) | 57         | HELA                                                              | 11,12                    | 12,13.3   | 8,12   | 9,10    | 16,18 | 7,7  | X,X | 8,12  | 9,10    | -       |
| 0.78<br>(28/36) | 57         | HELA                                                              | 11,12                    | 12,13.3   | 8,12   | 9,10    | 16,18 | 7,7  | X,X | 8,12  | 9,10    | -       |
| 0.78<br>(28/36) | 116        | GIRARDI HEART C2                                                  | 11,12                    | 12,13.3   | 8,12   | 9,10    | 16,18 | 7,7  | X,X | 8,12  | 9,10    | -       |
| 0.78<br>(28/36) | 121        | GIRARDI HEART C7                                                  | 11,12                    | 12,13.3   | 8,12   | 9,10    | 16,18 | 7,7  | X,X | 8,12  | 9,10    | -       |
| 0.78<br>(28/36) | 136        | KB                                                                | 11,12                    | 12,13.3   | 8,12   | 9,10    | 16,18 | 7,7  | X,X | 8,12  | 9,10    | -       |
| 0.78<br>(28/36) | 149        | KB-V1                                                             | 11,12                    | 12,13.3   | 8,12   | 9,10    | 16,18 | 7,7  | X,X | 8,12  | 9,10    | -       |
| 0.78<br>(28/36) | 158        | KB-3-1                                                            | 11,12                    | 12,13.3   | 8,12   | 9,10    | 16,18 | 7,7  | X,X | 8,12  | 9,10    | -       |
| 0.78<br>(28/36) | 161        | HELA-S3                                                           | 11,12                    | 12,13.3   | 8,12   | 9,10    | 16,18 | 7,7  | X,X | 8,12  | 9,10    | -       |
| 0.78<br>(28/36) | CCL-13     | HeLa [Chang Liver]                                                | 12,12                    | 12,13.3   | 8,12   | 9,10    | 16,18 | 7,7  | X,X | 8,12  | 10,10   | -       |
| 0.78<br>(28/36) | CCL-17     | KB                                                                | 11,12                    | 12,13.3   | 8,12   | 9,10    | 16,18 | 7,7  | X,X | 8,12  | 9,10    | -       |
| 0.78<br>(28/36) | CCL-2      | HeLa                                                              | 11,12                    | 12,13.3   | 8,12   | 9,10    | 16,18 | 7,7  | X,X | 8,12  | 9,10    | -       |
| 0.78<br>(28/36) | CCL-2.1    | HeLa 229                                                          | 11,12                    | 12,13.3   | 8,12   | 9,10    | 16,18 | 7,7  | X,X | 8,12  | 9,10    | -       |
| 0.78<br>(28/36) | CCL-20.2   | clone 1-5c-4 [Wong-Kilbourne derivative (D) of Chang conjunctiva] | 11,12                    | 12,13.3   | 8,12   | 9,10    | 16,18 | 7,7  | X,X | 8,12  | 9,10    | -       |
| 0.78<br>(28/36) | CCL-23     | HEp-2                                                             | 11,12                    | 12,13.3   | 8,12   | 9,10    | 16,18 | 7,7  | X,X | 8,12  | 9,10    | -       |
| 0.78<br>(28/36) | CCL-5      | L-132                                                             | 11,12                    | 12,13.3   | 8,12   | 9,10    | 16,18 | 7,7  | X,X | 8,12  | 9,10    | -       |
| 0.78<br>(28/36) | CCL-6      | intestine 407                                                     | 11,12                    | 12,13.3   | 8,12   | 9,10    | 16,18 | 7,7  | X,X | 8,12  | 9,10    | -       |
| 0.78<br>(28/36) | CCL-62     | FL                                                                | 11,12                    | 12,13.3   | 8,12   | 9,10    | 16,18 | 7,7  | X,X | 8,12  | 9,10    | -       |

|                 |           |                         |       |           |      |       |          |     |     |         |      |   |
|-----------------|-----------|-------------------------|-------|-----------|------|-------|----------|-----|-----|---------|------|---|
| 0.78<br>(28/36) | CL-48     | WRL 68                  | 11,12 | 12,13.3   | 8,12 | 9,10  | 16,18    | 7,7 | X,X | 8,12    | 9,10 | - |
| 0.78<br>(28/36) | CRL-12510 | HeLa NRI                | 11,12 | 12,13.3   | 8,12 | 9,10  | 16,18    | 7,7 | X,X | 8,12    | 9,10 | - |
| 0.78<br>(28/36) | CRL-13002 | GH329                   | 11,12 | 12,13.3   | 8,12 | 9,10  | 16,18    | 7,7 | X,X | 8,12    | 9,10 | - |
| 0.78<br>(28/36) | CRL-13011 | HeLaNR1                 | 11,12 | 12,13.3   | 8,12 | 9,10  | 16,18    | 7,7 | X,X | 8,12    | 9,10 | - |
| 0.78<br>(28/36) | CRL-1958  | H1HeLa                  | 11,12 | 12,13.3   | 8,12 | 9,10  | 16,18    | 7,7 | X,X | 8,12    | 9,10 | - |
| 0.78<br>(28/36) | CRL-2972  | HeLaRC32 [HeRC32]       | 11,12 | 12,13.3   | 8,12 | 9,10  | 16,18    | 7,7 | X,X | 8,12    | 9,10 | - |
| 0.78<br>(28/36) | CRM-CCL-2 | HeLa                    | 11,12 | 12,13.3   | 8,12 | 9,10  | 16,18    | 7,7 | X,X | 8,12    | 9,10 | - |
| 0.78<br>(28/36) | IFO50005  | J-111                   | 11,12 | 12,13.3   | 8,12 | 9,10  | 16,18    | 7,7 | X,X | 8,12    | 9,10 | - |
| 0.78<br>(28/36) | IFO50016  | Chang Liver             | 11,12 | 12,13.3   | 8,12 | 9,10  | 16,18    | 7,7 | X,X | 8,12    | 9,10 | - |
| 0.78<br>(28/36) | JCRB0073  | J-111                   | 11,12 | 12,13.3   | 8,12 | 9,10  | 16,18    | 7,7 | X,X | 8,12    | 9,10 | - |
| 0.78<br>(28/36) | JCRB0649  | HeLa.P3                 | 11,12 | 12,13.3   | 8,12 | 9,10  | 16,18    | 7,7 | X,X | 8,12    | 9,10 | - |
| 0.78<br>(28/36) | JCRB1309  | RPMI4788                | 11,12 | 13.3,13.3 | 8,12 | 10,10 | 16,18    | 7,7 | X,X | 8,12    | 9,10 | - |
| 0.78<br>(28/36) | JCRB1318  | HeLa9903                | 11,12 | 12,13.3   | 8,12 | 9,10  | 16,18    | 7,7 | X,X | 8,12    | 9,10 | - |
| 0.78<br>(28/36) | JCRB9004  | HeLa                    | 11,12 | 12,13.3   | 8,12 | 9,10  | 16,18    | 7,7 | X,X | 8,12    | 9,10 | - |
| 0.78<br>(28/36) | JCRB9027  | KB                      | 11,12 | 12,13.3   | 8,12 | 9,10  | 16,18    | 7,7 | X,X | 8,12    | 9,10 | - |
| 0.78<br>(28/36) | JCRB9086  | HeLa229                 | 11,12 | 12,13.3   | 8,12 | 9,10  | 16,18    | 7,7 | X,X | 8,12    | 9,10 | - |
| 0.76<br>(26/34) | RCB0191   | HeLa.S3                 | 11,12 |           | 8,12 | 9,10  | 16,18    | 7,7 | X,X | 8,12    | 9,10 | - |
| 0.76<br>(26/34) | RCB0205   | BU25 TK-                | 11,12 |           | 8,12 | 9,10  | 16,18    | 7,7 | X,X | 8,12    | 9,10 | - |
| 0.76<br>(26/34) | RCB1525   | HeLa.S3                 | 11,12 |           | 8,12 | 9,10  | 16,18    | 7,7 | X,X | 8,12    | 9,10 | - |
| 0.76<br>(26/34) | RCB1891   | HeLa TG                 | 11,12 |           | 8,8  | 9,10  | 16,18    | 7,7 | X,X | 12,12   | 9,10 | - |
| 0.76<br>(28/37) | JCRB9010  | HeLa S3                 | 11,12 | 13.3,13.3 | 8,8  | 9,10  | 16,17,18 | 7,7 | X,X | 8,12    | 9,10 | - |
| 0.76<br>(28/37) | JCRB9066  | Chang Liver             | 11,12 | 12,13.3   | 8,12 | 9,10  | 16,17,18 | 7,7 | X,X | 8,12    | 9,10 | - |
| 0.72<br>(26/36) | RCB0007   | HeLa                    | 11,12 | 12,12     | 8,12 | 9,10  | 16,18    | 7,7 | X,X | 8,12    | 9,10 | - |
| 0.72<br>(26/36) | RCB0402   | "HeLa <sub>1</sub> ⊖P3" | 11,12 | 12,12     | 8,12 | 9,10  | 16,18    | 7,7 | X,X | 8,12    | 9,10 | - |
| 0.72<br>(26/36) | RCB1889   | HEp-2                   | 11,12 | 12,12     | 8,12 | 9,10  | 16,18    | 7,7 | X,X | 8,12    | 9,10 | - |
| 0.72<br>(26/36) | RCB2356   | HeLa-CD4-LTR-??-gal     | 11,12 | 12,12     | 8,12 | 9,10  | 16,18    | 7,7 | X,X | 8,12    | 9,10 | - |
| 0.72<br>(26/36) | RCB2358   | HLtat                   | 11,12 | 12,12     | 8,12 | 9,10  | 16,18    | 7,7 | X,X | 8,12    | 9,10 | - |
| 0.70<br>(26/37) | CRL-2182  | EPLC-32M1               | 11,12 | 13.3,14.3 | 8,12 | 9,10  | 17,18    | 7,7 | X,X | 8,12,13 | 9,10 | - |
| 0.67<br>(24/36) | CHB0001   | HSY                     | 11,11 | 12,13.3   | 8,12 | 9,10  | 16,18    | 7,7 | X,X | 8,12    | 9,9  | - |
| 0.67<br>(24/36) | IFO50011  | HeLa S3                 | 11,11 | 12,13.3   | 8,12 | 9,10  | 17,18    | 7,7 | X,X | 8,12    | 9,10 | - |
| 0.67<br>(24/36) | JCRB0713  | HeLa S3(sc)             | 11,11 | 12,13.3   | 8,12 | 9,10  | 17,18    | 7,7 | X,X | 8,12    | 9,10 | - |
| 0.67<br>(24/36) | RCB2355   | HeLa CD4+Clone1022      | 11,12 | 12,12     | 8,12 | 9,9   | 16,18    | 7,7 | X,X | 8,12    | 9,10 | - |
| 0.65<br>(24/37) | CHB0002   | HSG-AZA3                | 11,11 | 12,13.3   | 8,12 | 9,10  | 16,18,19 | 7,7 | X,X | 8,12    | 9,9  | - |
| 0.65<br>(24/37) | CHB0003   | HSG-AZA1                | 11,11 | 12,13.3   | 8,12 | 9,10  | 16,18,19 | 7,7 | X,X | 8,12    | 9,9  | - |
| 0.65<br>(24/37) | CHB0004   | HSG                     | 11,11 | 12,13.3   | 8,12 | 9,10  | 16,18,19 | 7,7 | X,X | 8,12    | 9,9  | - |
|                 | JCRB1070  | HSGc-C5                 | 11,11 | 12,13.3   | 8,12 | 9,10  | 16,18,19 | 7,7 | X,X | 8,12    | 9,9  | - |

|                 |          |                               |       |         |       |       |          |       |     |      |       |   |  |
|-----------------|----------|-------------------------------|-------|---------|-------|-------|----------|-------|-----|------|-------|---|--|
| 0.65<br>(24/37) |          |                               |       |         |       |       |          |       |     |      |       |   |  |
| 0.65<br>(24/37) | JCRB1070 | HSGc-C5                       | 11,11 | 12,13,3 | 8,12  | 9,10  | 16,18,19 | 7,7   | X,X | 8,12 | 9,9   | - |  |
| 0.65<br>(22/34) | RCB0503  | HeLa.S3(Mer <sup>-</sup> (-)) | 11,12 |         | 8,8   | 9,10  | 15,18    | 7,7   | X,X | 8,12 | 9,10  | - |  |
| 0.65<br>(22/34) | RCB0504  | MR1-3                         | 11,12 |         | 8,8   | 9,10  | 15,18    | 7,7   | X,X | 8,12 | 9,10  | - |  |
| 0.65<br>(22/34) | RCB0507  | MR10-1                        | 11,12 |         | 8,8   | 9,10  | 15,18    | 7,7   | X,X | 8,12 | 9,10  | - |  |
| 0.63<br>(22/35) | RCB0505  | MR6                           | 11,12 |         | 8,8   | 9,10  | 15,16,18 | 7,9,3 | X,X | 8,12 | 9,10  | - |  |
| 0.61<br>(22/36) | 367      | BFTC-909                      | 11,12 | 11,13   | 12,12 | 9,10  | 14,18    | 7,7   | X,X | 8,8  | 12,13 | - |  |
| 0.61<br>(22/36) | CRL-7164 | Hs 203.Sp                     | 11,12 | 8,9     | 12,12 | 11,11 | 16,18    | 7,7   | X,X | 8,11 | 10,12 | - |  |
| 0.61<br>(22/36) | CRL-7165 | Hs 203.Th                     | 11,12 | 8,9     | 12,12 | 11,11 | 16,18    | 7,7   | X,X | 8,11 | 10,12 | - |  |
| 0.61<br>(22/36) | RCB0271  | HeLa S3 (SC)                  | 11,11 | 12,12   | 8,12  | 9,10  | 17,18    | 7,7   | X,X | 8,12 | 9,10  | - |  |

Analyze again **after changing the EV**

| EV        | Cell No. Scored |  |
|-----------|-----------------|--|
| 0.95~1.00 | 0               |  |
| 0.90~0.95 | 0               |  |
| 0.85~0.90 | 1               |  |
| 0.80~0.85 | 12              |  |
| 0.75~0.80 | 39              |  |
| 0.70~0.75 | 6               |  |
| 0.65~0.70 | 12              |  |
| 0.60~0.65 | 5               |  |
| 0.55~0.60 | 14              |  |
| 0.50~0.55 | 59              |  |
| 0.45~0.50 | 11              |  |
| 0.40~0.45 | 141             |  |
| 0.35~0.40 | 345             |  |
| 0.30~0.35 | 713             |  |
| 0.25~0.30 | 721             |  |
| 0.20~0.25 | 649             |  |
| 0.15~0.20 | 421             |  |
| 0.10~0.15 | 106             |  |
| 0.05~0.10 | 9               |  |
| 0.00~0.05 | 10              |  |

If the results obtained by the search engine are used in any publication, please cite the respective paper: Dirks WG, MacLeod RA, Nakamura Y, Kohara A, Reid Y, Milch H, Drexler HG, Mizusawa H.: Cell line cross-contamination initiative: an interactive reference database of STR profiles covering common cancer cell lines. *Int J Cancer*. 2010 Jan 1;126(1):303-4. (link: <https://onlinelibrary.wiley.com/doi/full/10.1002/ijc.24999>)
